# Supplementary material
Source: publisher figshare collection journal article supplement (https://acs.figshare.com/ndownloader/files/3986539)
Supplement: Supplementary file 1 [file 3986539]

## Supplemental Information

### **Nanoparticle-Protein Interactions: A Thermodynamic and Kinetic Study of The Adsorption of Bovine Serum Albumin to Gold Nanoparticle Surfaces**

Stefano P. Boulos<sup>1</sup>, Tyler A. Davis<sup>2</sup>, Alaaldin Alkilany<sup>3</sup>, Lisa A. Holland<sup>2</sup>, Catherine J. Murphy<sup>1\*</sup>

<sup>1</sup>Department of Chemistry, University of Illinois at Urbana-Champaign,

600 South Mathews Avenue, Urbana IL 61801, U.S.A

<sup>2</sup>C. Eugene Bennett Department of Chemistry, West Virginia University,

217 Clark Hall, Prospect Street, Morgantown WV 26506, U.S.A

<sup>3</sup>Department of Pharmaceutics & Pharmaceutical Technology, Faculty of Pharmacy, The

University of Jordan, Amman 11942, Jordan

\*Corresponding author. E-mail: [murphycj@illinois.edu](mailto:murphycj@illinois.edu); Tel.: +1 (217) 333-7680

## 1- Gold nanoparticles characterization

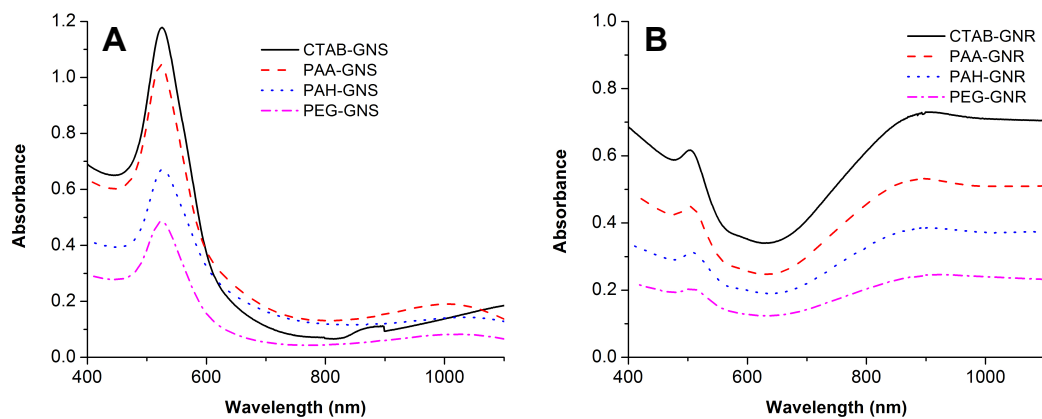

Figure S1. UV-vis absorbance spectroscopy of (A) gold nanospheres and (B) gold nanorods of aspect ratio 18 with different surface chemistries.

## 2- Double logarithmic plot for GNRs of A.R. 18 and gold nanospheres.

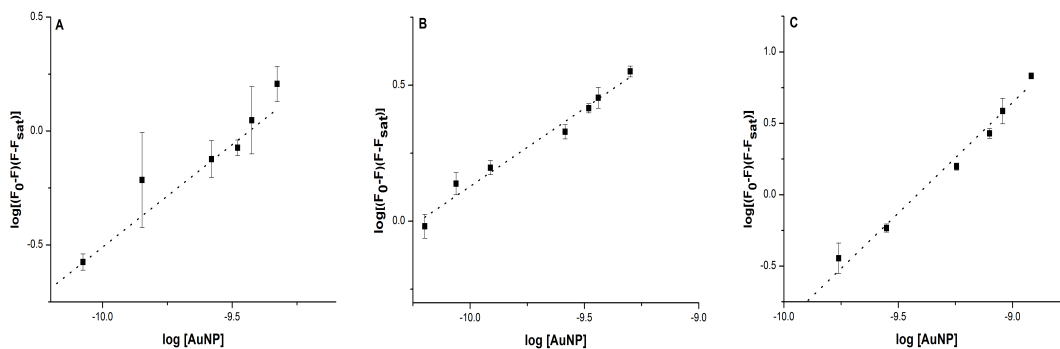

Figure S2 (A). Double logarithmic depicting the binding curve resulting from the adsorption of BSA to gold nanospheres from fluorescence quenching titrations.

(A) PAA-GNS, (B) PAH-GNS, and PEG-GNS.

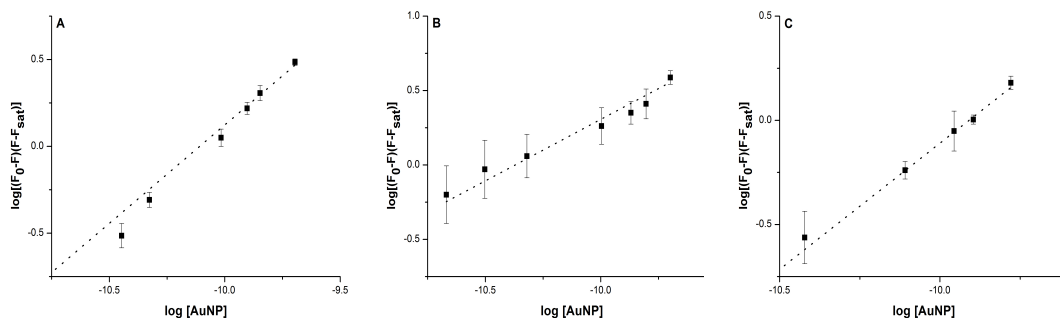

Figure S2 (B). Double logarithmic depicting the binding curve resulting from the adsorption of BSA to aspect-ratio-18 gold nanorods from fluorescence quenching titrations. (A) PAA-GNRs, (B) PAH-GNRs, and PEG-GNRs.

### 3- Affinity Capillary Electrophoresis (ACE)

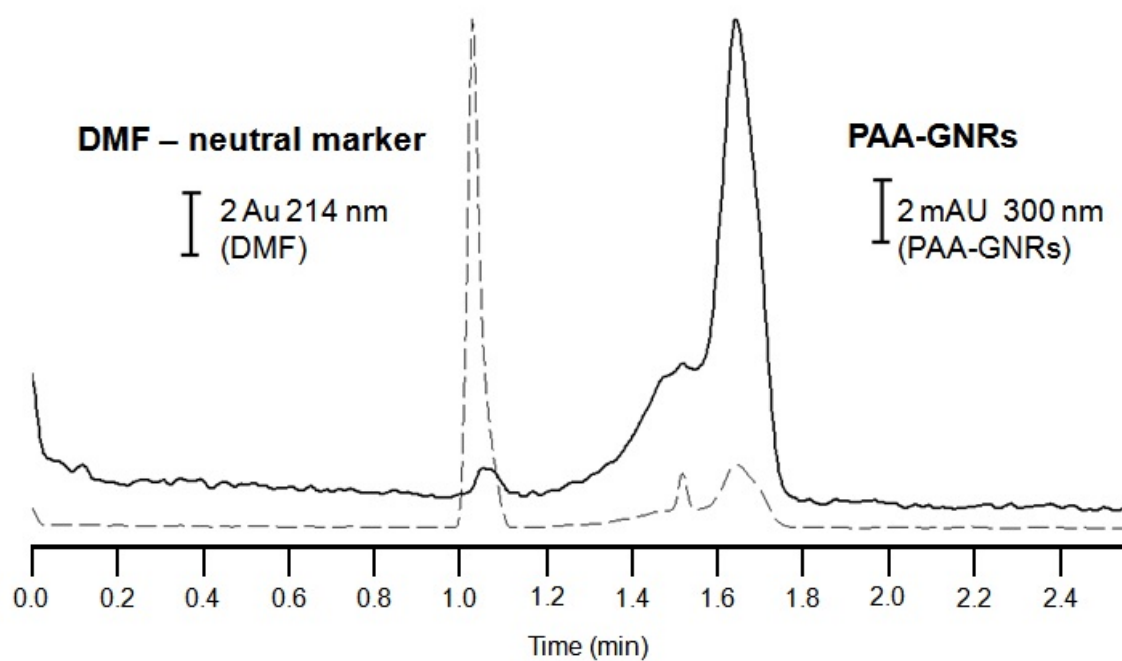

Figure S3. Overlay Electropherograms of DMF measured at 214 nm and free PAA-GNRs at 300 nm.

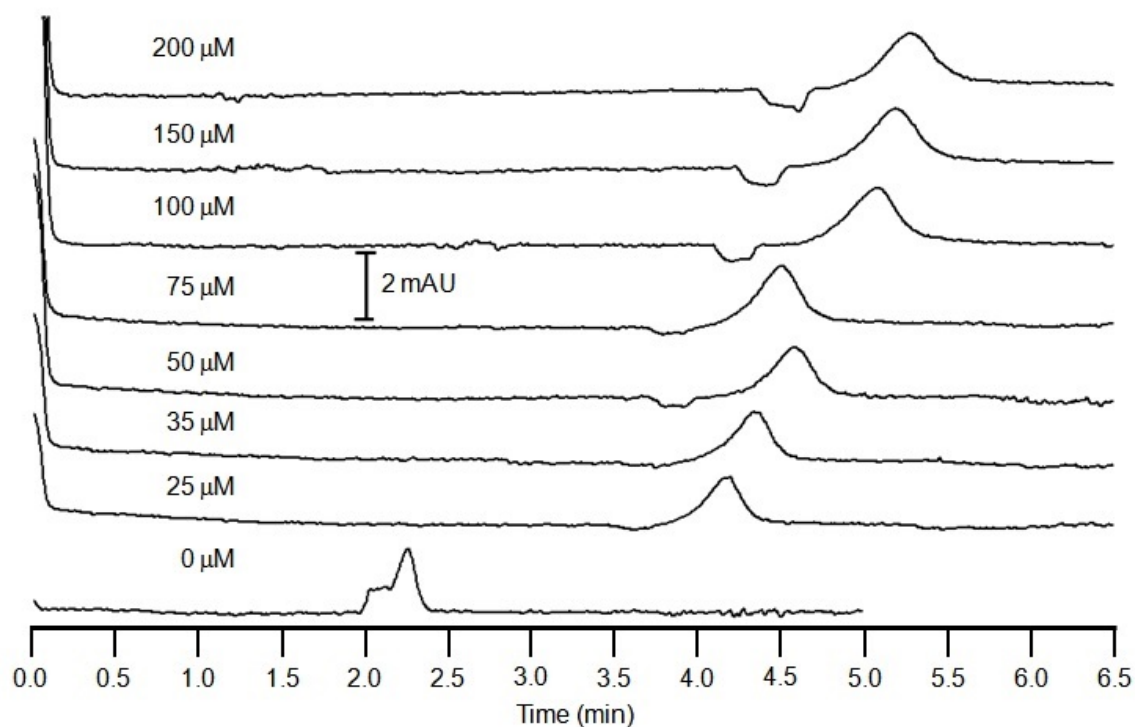

Figure S4. Electropherogram of PEG-GNRs (6.2 nM) detected at 325 nm with BSA in 5 mM MOPS buffer. Concentrations of BSA in the background electrolyte increase from 0  $\mu\text{M}$  (lower trace) to 200  $\mu\text{M}$  (upper trace). At different concentration of BSA in the running buffer (0, 10, 15, 25, 35, 50, 75, 100, 150, 200  $\mu\text{M}$ ), a shift in the apparent mobility of the GNRs is observed. The wavelength 325 nm was selected to minimize interference from a negative peak that occurs around 4.2 minutes from the absence of BSA in the running buffer.

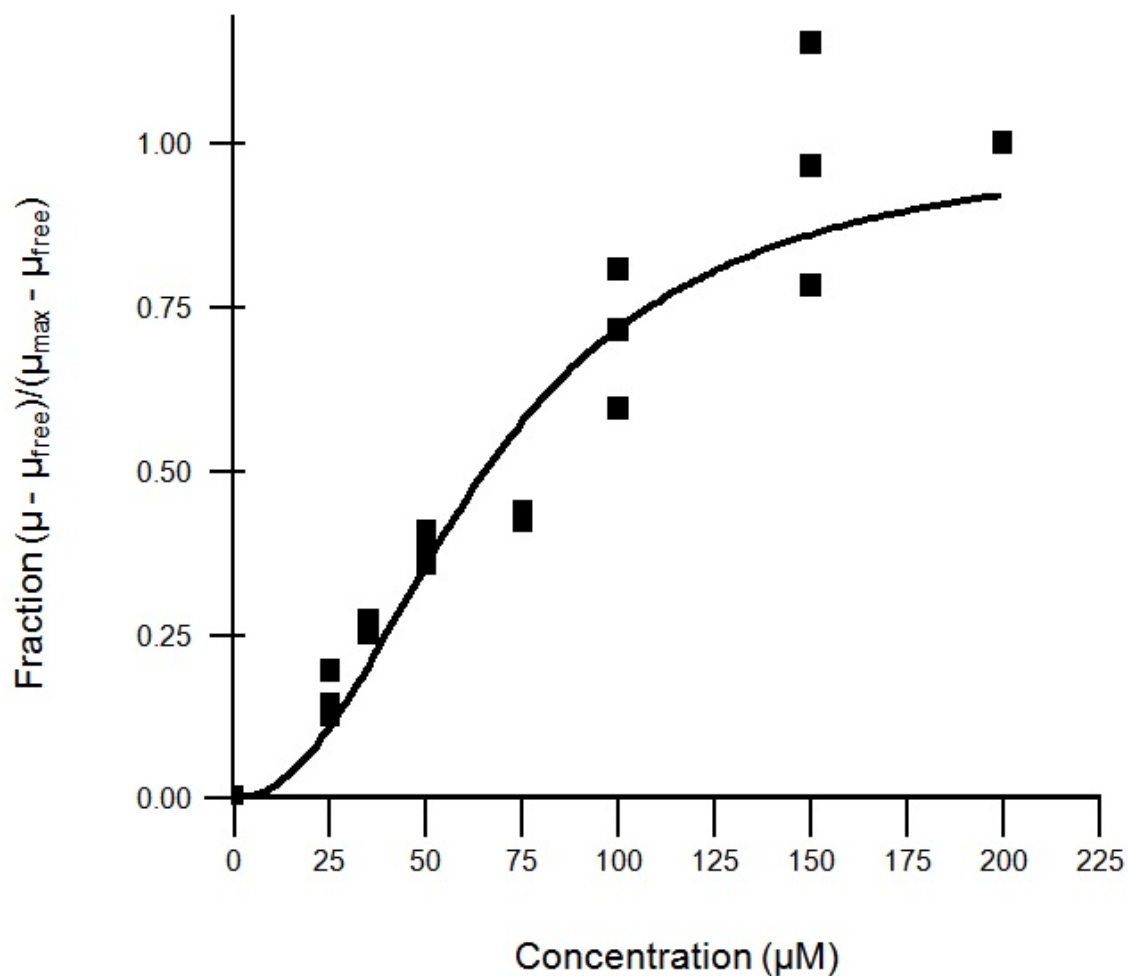

Figure S5. The dissociation constant is derived from the curve fit using pooled data from PEG-GNRs (6.2 nM) detected at 325 nm with increasing concentration of BSA in 5 mM MOPS buffer. The pooled data is combination of all points from three replicate curves.

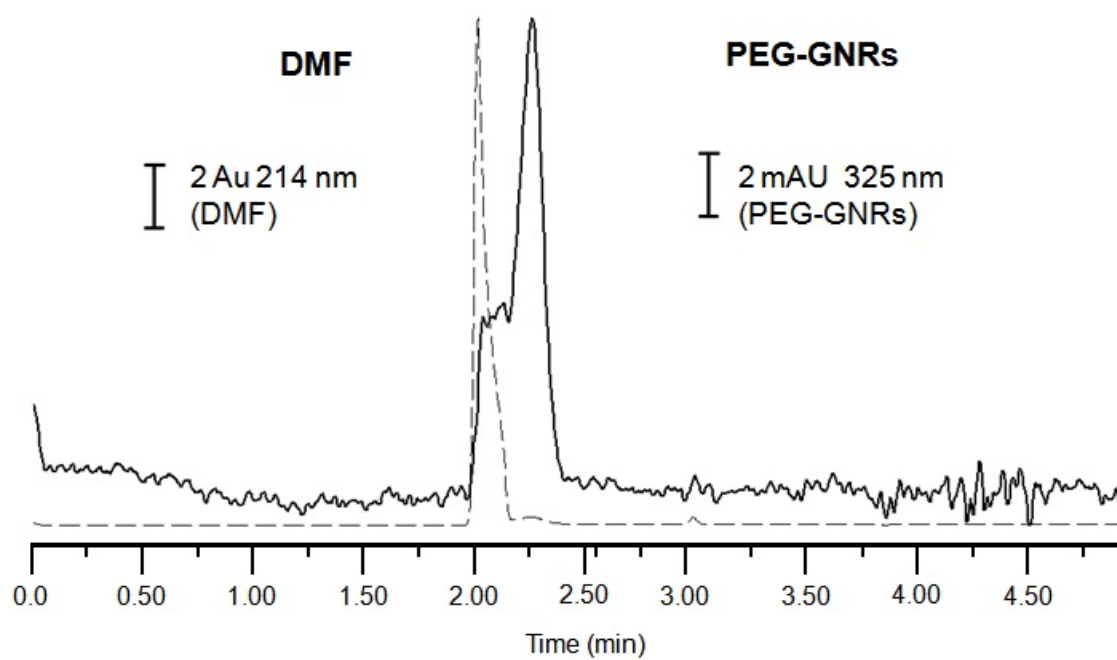

Figure S6. Overlay Electrophoregrams of DMF measured at 214 nm and free PEG-GNRs at 325 nm.
